# Supplementary material for: The Impact of a Co – created Comic Story and Activity Book on Personal Hygiene Awareness and Practices Among Primary School Pupils in Yenagoa, Bayelsa State, Nigeria
Source: Research Square preprint supplement (doi:10.21203/rs.3.rs-6285406/v1), 2025-05-07
Supplement: Supplementary file 1 [file e88dc04ef82e0d7637de65fe.docx]

**School Pupil’s Questionnaire**

**Baseline Data Questionnaire**

**Introduction**

Thank you for participating in this survey. Your responses will help us understand awareness on the access, quality, and usage patterns of water in your community. Please answer the following questions to the best of your ability.

**Section 1: Socio Demographic Information**

Age: [ ] years

Gender: [ ] Male [ ] Female [ ]

Class

Caregiver Type:

Household Size

Education status of parents

Occupation of parents or Guardian

Religion

**Awareness and practice on the access, quality, and use of water**

**Section 2: Access to Water**

**Do you have access to a reliable water source in your home?**

[ ] Yes

[ ] No

**What is the primary source from which you get water in your home?**

1. Public Tap
2. Private Well
3. Community Well
4. Bottled Water
5. River/stream
6. Rainwater Collection
7. Others

**How often do you access your primary source of water?**

1. Multiple times a day

1. Once a day
2. A few times a week
3. Once a week
4. Less than once a week

**Section 3: Awareness of Water Quality**

**Are you aware of the quality of water you consume?**

[ ] Yes

[ ] No

**If yes, how would you rate the quality of your water?**

1. Very good

2. Good

3. Fair

4. Poor

5. Very poor

**Do you treat your water before use?**

1. Yes

2. No

**If yes, what treatment methods do you use? (Check all that apply)**

1. Boiling

2. Filtration

3. Chemical treatment

4. UV Purification

5. Others (Please Specify)

**Section 4: Water Usage Patterns**

**What is the primary use of water in your household? (Check all that apply)**

1. Drinking

2. Cooking

3. Bathing

4. Laundry

5. Other (please specify):

**Do you wash fruits before eating them?**

1. Always

2. Often

3. Sometimes

4. Rarely

5. Never

**What type of water do you use to wash fruits?**

1. Tap Water

2. Bottled Water

3. Filtered Water

4. Rainwater

5. Others (Please Specify)

**How do you wash your fruits (check all that apply)**

1. Rinsing with water

2. Scrubbing with a brush

3. Using soap to wash the fruit

4. Using vinegar or lemon solution

1. Other (Please specify)

**Why do you wash fruits before eating them? (Check all that apply)**

1. Remove dirt

2. Remove Pesticides

3. Remove bacteria

4. Habit

5. Others (Please Specify)

**Do you think washing fruits before eating them is necessary?**

1. Yes

2. No

3. Not sure

**How much time do you spend washing fruits**

1. Less than a minute

2. 1-2 Minutes

3. 3-5 Minutes

4. More than 5 minutes

**Section 5: Awareness and practice on Sanitation**

**Do you know what sanitation mean?**

1. Yes

2. No

3. Not sure

**Why is it important to keep your surrounding clean?**

1. To prevent Germs from coming in contact with you

2. To keep your surrounding looking nice

3. To prevent you and the other persons living in your surrounding from falling ill

4. To maintain safety in our surrounding

5. To make you a responsible citizen

**Do your teachers teach you about keeping clean and healthy?**

1. Yes

2. No

**Do you clean your surrounding without being told or forced?**

1. Yes

2. No

**Have you participated in any clean up activities at school or in your community?**

1. Yes

2. No

**How do you clean your surrounding?**

1. Sweeping floor areas, cleaning slabs and walls.

2. Emptying the trash or waste bin.

3. Keeping the surroundings of the facility tidy and safe.

4. Replacing soaps, tissues and other cleaning materials.

**How do you properly use toilet and latrine systems for safe excreta disposal?**

1. Always sit on the toilet seat or squat over the toilet structure, especially if it has no seater or is a pit latrine.
2. Do not throw plastics, rubber, or other non-biodegradable materials into the toilet or latrine.
3. Cover the toilet and flush properly with water after use. Check to ensure that waste has been carried away. If it is a pit latrine, ensure that the corners of the hole provided are not soiled with excreta.
4. If it has a cover or lid, always cover the toilet after use.
5. Wash your hands with soap and clean, running water.
6. After use, always ensure the toilet or latrine is in good condition for the next person to use.

| **Section 6: Awareness and practice on hygiene**  **Do you know what hand washing is?**  1. Yes  2. No  **If yes, can you explain what it means to wash your hands?**  What do you think are the reasons for washing your hands?  **Where did you learn about hand washing?**  School  Home  Other (please specify)  **Understanding the Importance of Hand Washing**:  **Have you ever heard about germs?**  1.Yes  2. No  **If yes, do you know where germs come from**  1. Air  2. Our Environment  3. Contaminated Water  4. Our Toys  5. Others (Specify)  **Can germs make you sick?**  1. Yes  2. No  **Do you think washing your hands helps prevent getting sick?**  1. Yes  2. No  **Hand Washing Practices**:  How often do you wash your hands with soap?  1. Before eating  2. After using the toilet  3. After playing outside  4. Others (Specify)  **Can you describe how you wash your hands?**  1. In a bowl with water  2. In a bowl with soap and water  3. Under a running tap with soap  4. Under a running tap without soap  5 Others (Specify)  **How long do you spend washing your hands?**  1. Less than 3mins  2. 3mins  3. More than 3mins  4. Not sure  **Do you wash your hands after using the toilet?**  1.Yes  2.No  **Practice on personal hygiene**  **How often do you brush your teeth?**  1**.** Once a day  2. Twice a day  3. Occasionally  4. Never  **Do you use toothpaste when you brush your teeth?**  1. Always  2. Sometimes  3. Never  **How often do you change your toothbrush**  1. Once every three months  2. Once every six months  3. Once a year  4. Never  **How often do you trim your nails**  1. Once a week  2. Every two weeks  3. Once a month  4. Never  **What do you use in trimming your nails**  1. Your Tooth  2. Razor blade  3. Nail Trimmer  4. Others (Specify)  **Do you clean your nails regularly**  1. Yes  2. No  **How often do you comb your hair**  1. Every day  2. Every few days  3. Once a week  4. Never  **Do you use your own comb, or do you share comb with others**  1. Yes, I use my own comb  2. No, I share comb with others  **Do you make use of soap when you bath**  1. Always  2. Sometimes  3. Never  **How often do you take your bath**  1. Every day  2. Every other day  3. Once a week  4. Less than once a week  **Do you take your bath immediately you return from school?**  1. Always  2. Sometimes  3. Never  **Do you have your own towel for drying your body after bathing**  1. Yes  2. No  **How often do you wash your towel**  1. Once a week  2. Every two weeks  3. Once a month  4. Less than once a month  **Role of Teachers and Parents**:  Do your teachers talk to you about the importance of a good hygiene?  Do your parents or guardians remind you to wash your hands at home?  Do you think it's important for teachers and parents to encourage good hygiene?  **Community Awareness and Initiatives**:  Have you ever participated in any activities or events at school related to hand washing and personal hygiene?  Are there any hand washing and personal hygiene posters or signs displayed at your school?  Have you seen or heard any messages about hand washing and personal hygiene on TV, radio, or other media? | |
| --- | --- |
| **Section 7: Awareness and Knowledge of Diarrhoea**:  **Have you heard about diarrhoea before?**  1. Yes  2. No  **If yes, can you describe what diarrhoea is?**  1. Passage of watery poo  2. Vomiting  3. Passage of watery poo and vomiting  **Do you know what causes diarrhoea?**  1. Germs  2. Bacteria  3. Dirty Water  4. Dirty Surrounding  5. Others (Specify)  **Do you know how diarrhea is being transmitted?**  1. Yes  2. No  **Have you ever had diarrhoea yourself?**  1. Yes  2. No  If yes, how did you feel during that time?  **Have you experienced diarrhea in the past 2 months**  1. Yes  2. No  **What are some symptoms or signs of diarrhoea?**  1. Frequent loose, watery stool  2. Fever  3. Dehydration  4. Nausea and Vomiting  **Hygiene Practices**:  Do you think hand washing is important for preventing diarrhea?   - 1. Yes   2. No   What other hygiene practices do you follow to prevent illnesses like diarrhea?  **School and Community Awareness:**  Have you learned about diarrhoea in school before?  If yes, where did you learn about it (e.g., health classes, posters)?  Are there any activities or events in your community that talk about diarrhoea and how to prevent it?  Have you seen any advertisements or messages on TV, radio, or posters about diarrhoea?  **Impact on Daily Life**:  How does having diarrhea affect your daily activities, such as going to school or playing?  1. You are not able to play  2. You are not able to go to school  3. You always feel sick  4. Others (Specify)  Do you think diarrhea affects your ability to learn and concentrate in school?  1. Yes  2. No  **Section 8: Role of the children in promoting wash at home and in school**  **WASH Practices at Home**  How often do you wash your hands with soap at home?  Are you being reminded to wash your hands and maintain good hygiene at home? If yes by who  Do you discuss with your family about the importance of using only clean water, washing hands and maintaining good hygiene  Have you ever taught anyone in your family how to wash their hands properly  How do you keep your home and environment clean and hygienic  **Do you encourage others in your household to wash fruits?**  1. Yes  2. No  3. Sometimes  **WASH Practices at school**  Do you discuss about WASH topics with your friends and teachers in school  Do you remind your friends at school to wash their hands, maintain good hygiene and eat healthy nutritious food?  How do you contribute to maintaining hygiene in your school? Options  Have you participated in any WASH activities In school |
